# Supplementary material for: Dental microwear reveals mammal-like chewing in the neoceratopsian dinosaur Leptoceratops gracilis
Source: PeerJ. 2016 Jul 6;4:e2132. doi: 10.7717/peerj.2132 (PMC4941762; doi:10.7717/peerj.2132)
Supplement: Article S2 [file peerj-04-2132-s002.xlsm]

## Sheet: Sheet1
Feature #	X1	Y1	X1'	Y1'	X2	Y2	X2'	Y2'	Linear1	Linear2	Length	Breadth	Ratio	X3	Y3	X3'	Y3'	X3''	Y3''	B	C	A (Hyp)	Radians	Degrees	Angle	EuLength	EuWidth	Feature #
1	94	34	335	271	313	249	309	253	338.009	5.65685	338.009	5.65685	59.7521	94	34	335	271	335	34	237	241	338.009	2.36456	135.5	141.6	182.6	4.8	17
2	224	136	29	325	49	301	54	305	271.562	6.40312	271.562	6.40312	42.4109	224	136	29	325	29	136	189	195	271.562	0.769774	44.1	138.1	426.3	3.8	20
3	66	184	588	780	583	773	578	775	792.275	5.38516	792.275	5.38516	147.122	66	184	588	780	588	184	596	522	792.275	2.2901	131.2	137.4	572.8	3.6	18
4	254	335	473	538	428	495	426	499	298.613	4.47214	298.613	4.47214	66.772	254	335	473	538	473	335	203	219	298.613	2.39409	137.2	137.2	252.8	3.8	4
5	354	250	888	804	884	796	880	798	769.462	4.47214	769.462	4.47214	172.057	354	250	888	804	888	250	554	534	769.462	2.33781	133.9	135.9	306.6	4.2	16
6	548	533	784	798	784	792	780	795	354.853	5	354.853	5	70.9707	548	533	784	798	784	533	265	236	354.853	2.29837	131.7	135.8	568.8	3.8	14
7	543	364	797	654	792	645	789	647	385.507	3.60555	385.507	3.60555	106.921	543	364	797	654	797	364	290	254	385.507	2.29011	131.2	135.6	231.1	5.4	19
8	299	41	567	316	538	285	534	288	383.991	5	383.991	5	76.7982	299	41	567	316	567	41	275	268	383.991	2.3433	134.3	135.5	286.2	4.8	1
9	399	28	560	212	554	202	549	204	244.493	5.38516	244.493	5.38516	45.4013	399	28	560	212	560	28	184	161	244.493	2.28963	131.2	134.7	429.9	4.2	15
10	622	174	716	275	714	267	709	269	137.975	5.38516	137.975	5.38516	25.6212	622	174	716	275	716	174	101	94	137.975	2.32031	132.9	134.3	325.1	4.2	8
11	703	81	954	352	949	344	945	348	369.381	5.65685	369.381	5.65685	65.2979	703	81	954	352	954	81	271	251	369.381	2.3179	132.8	133.9	651.5	3.8	5
12	817	274	955	445	954	438	948	440	219.738	6.32456	219.738	6.32456	34.7437	817	274	955	445	955	274	171	138	219.738	2.2498	128.9	132.9	116.8	4.6	10
13	762	302	939	508	936	505	933	508	271.597	4.24264	271.597	4.24264	64.0161	762	302	939	508	939	302	206	177	271.597	2.28062	130.7	132.8	312.7	4.8	11
14	711	354	1193	822	1185	812	1181	814	671.824	4.47214	671.824	4.47214	150.224	711	354	1193	822	1193	354	468	482	671.824	2.37093	135.8	131.7	300.4	4.2	6
15	674	445	1031	806	1029	802	1026	806	507.711	5	507.711	5	101.542	674	445	1031	806	1031	445	361	357	507.711	2.35062	134.7	131.2	670.8	4.6	3
16	878	396	1138	648	1139	643	1135	646	362.083	5	362.083	5	72.4166	878	396	1138	648	1138	396	252	260	362.083	2.37182	135.9	131.2	326.4	3.1	7
17	1206	716	1375	850	1373	843	1369	847	215.678	5.65685	215.678	5.65685	38.1268	1206	716	1375	850	1375	716	134	169	215.678	2.4712	141.6	131.2	207	4.6	9
18	946	289	1444	747	1445	743	1442	746	676.586	4.24264	676.586	4.24264	159.473	946	289	1444	747	1444	289	458	498	676.586	2.39801	137.4	130.7	230	3.6	13
19	1118	304	1313	495	1311	492	1306	496	272.958	6.40312	272.958	6.40312	42.6289	1118	304	1313	495	1313	304	191	195	272.958	2.36656	135.6	128.9	186	5.4	12
20	1025	91	1400	427	1393	421	1391	425	503.509	4.47214	503.509	4.47214	112.588	1025	91	1400	427	1400	91	336	375	503.509	2.41099	138.1	44.1	229.9	5.4	2
